# Supplementary material for: Comparison of Quantification Methods to Estimate Farm-Level Usage of Antimicrobials Other than in Medicated Feed in Dairy Farms from Québec, Canada
Source: MDPI journal article supplement (doi:10.3390/microorganisms9051106), 2021-05-20
Supplement: s1 [file s1]

**Table S2.** Demographic data (number of farms recruited by region, herd size, and owned quota) of the 101 dairy farms recruited in the Québec province of Canada.

| Demographic data collected                                                        | Montréal      | Centre-du-Québec | Estrie        | Total         |
|-----------------------------------------------------------------------------------|---------------|------------------|---------------|---------------|
| Number of farms recruited                                                         | 45            | 34               | 22            | 101           |
| Herd size in number of adult dairy cows <sup>1</sup> per farm (median (min, max)) | 65 (20, 150)  | 59 (30, 98)      | 62 (35, 106)  | 61 (20, 150)  |
| Herd size in total number of cattle per farm (median (min, max))                  | 109 (39, 260) | 105 (50, 192)    | 103 (51, 175) | 107 (39, 260) |
| Owned quota in kg of fat content per day (median (min, max))                      | 73 (20, 174)  | 58 (19, 101)     | 59 (34, 110)  | 65 (19, 174)  |

<sup>1</sup>Including lactating cows and dry cows.

## References

1. Lardé, H.; Dufour, S.; Archambault, M.; Massé, J.; Roy, J.-P.; Francoz, D. An observational cohort study on antimicrobial usage on dairy farms in Quebec, Canada. *J. Dairy Sci.* **2021**, *104*, 1864–1880, doi:10.3168/jds.2020-18848.
